# Supplementary material
Source: HighWire-hosted journal article supplement (https://jnm.snmjournals.org/highwire/filestream/95432/field_highwire_adjunct_files/0/217117_Supplemental_Data.pdf)
Supplement: 217117_Supplemental_Data.pdf [file 217117_Supplemental_Data.pdf]

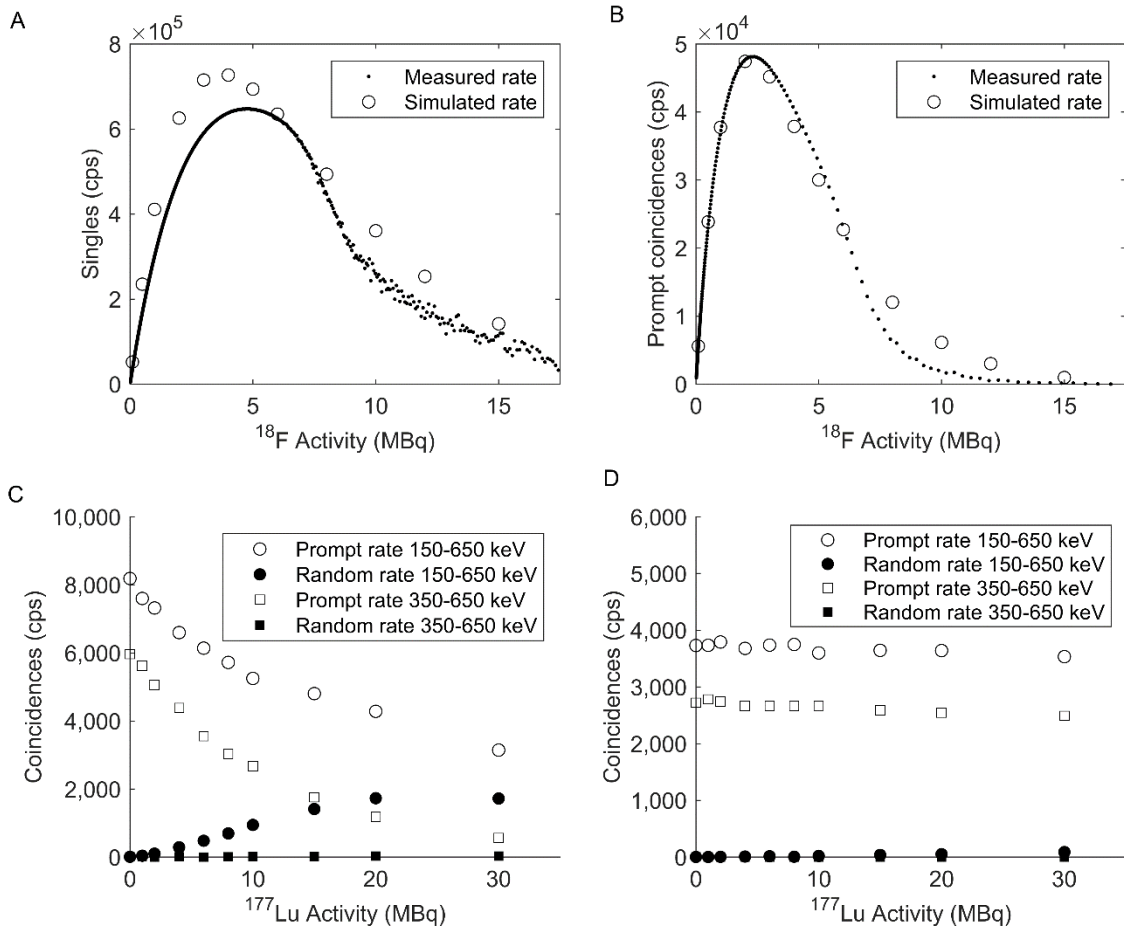

**SUPPLEMENTAL FIGURE 1.** GATE Monte Carlo simulated count rates. **A.** Measured and simulated single count rates from  $^{18}\text{F}$  source for optimized digitizer model. **B.** Simulated and measured prompt coincidence rate from a  $^{18}\text{F}$  source for optimized digitizer model. **C.** Simulated coincidence rate from 100 kBq  $^{18}\text{F}$  for increasing activity of  $^{177}\text{Lu}$  present in the phantom volume for a narrow and wide energy window. **D.** Simulated coincidence rate when 3 mm Rose metal shield phantom in C) for narrow and wide energy window.
